# Supplementary material for: Enantioselective chiral sorption of 1-phenylethanol by homochiral 1D coordination polymers
Source: Royal Society of Chemistry journal article supplement (doi:10.1039/d1qi01457a), 2021-12-24
Supplement: d1qi01457a1.pdf [file d1qi01457a1.pdf]

## Enantioselective chiral sorption of 1-phenylethanol by homochiral 1D coordination polymers

Winnie Cao<sup>a</sup>, Owen P. Missen<sup>b,c</sup> and David R. Turner<sup>a\*</sup>

<sup>a</sup>School of Chemistry, Monash University, Clayton, VIC 3800, Australia; [david.turner@monash.edu](mailto:david.turner@monash.edu)

<sup>b</sup>School of Earth, Atmosphere and Environment, Monash University, Clayton, VIC 3800, Australia

<sup>c</sup>Geosciences, Museums Victoria, Melbourne, VIC 3001, Australia

\*Correspondence: [david.turner@monash.edu](mailto:david.turner@monash.edu); Tel.: +61-3-9905-6293

### Supporting Information

|                                                          |           |
|----------------------------------------------------------|-----------|
| <b>1. X-Ray Crystallography</b> .....                    | <b>2</b>  |
| 1.1 Crystallographic Data.....                           | 2         |
| 1.2 Bond Tables .....                                    | 3         |
| 1.3 Additional Crystallographic Refinement Details ..... | 6         |
| <b>2. Powder X-Ray Diffraction (PXRD)</b> .....          | <b>7</b>  |
| <b>3. Separation Studies</b> .....                       | <b>8</b>  |
| 3.1 Chiral GC-FID.....                                   | 8         |
| 3.2 Soaking Studies .....                                | 9         |
| 3.3 'Micro-column' Study .....                           | 10        |
| <b>4. Thermogravimetric Analysis Traces</b> .....        | <b>11</b> |
| <b>5. References</b> .....                               | <b>12</b> |

# 1. X-Ray Crystallography

## 1.1 Crystallographic Data

| Compound reference                          | <b>1</b>                                                                          | <b>1-PEC1</b>                                                                          | <b>2</b>                                                                                          |
|---------------------------------------------|-----------------------------------------------------------------------------------|----------------------------------------------------------------------------------------|---------------------------------------------------------------------------------------------------|
| Empirical formula                           | C <sub>126</sub> H <sub>124</sub> Co <sub>4</sub> N <sub>26</sub> O <sub>41</sub> | C <sub>128</sub> H <sub>125.5</sub> Co <sub>4</sub> N <sub>26</sub> O <sub>40.75</sub> | C <sub>53</sub> H <sub>60</sub> Cl <sub>2</sub> Co <sub>2</sub> N <sub>13</sub> O <sub>11.5</sub> |
| Formula weight                              | 2894.22                                                                           | 2915.76                                                                                | 1251.9                                                                                            |
| Temperature/K                               | 100.15                                                                            | 100                                                                                    | 100.15                                                                                            |
| Crystal system                              | triclinic                                                                         | triclinic                                                                              | orthorhombic                                                                                      |
| Space group                                 | <i>P1</i>                                                                         | <i>P1</i>                                                                              | <i>P2<sub>1</sub>2<sub>1</sub>2<sub>1</sub></i>                                                   |
| a/Å                                         | 13.779(3)                                                                         | 13.742(3)                                                                              | 15.344(3)                                                                                         |
| b/Å                                         | 14.632(3)                                                                         | 14.707(3)                                                                              | 18.543(4)                                                                                         |
| c/Å                                         | 19.730(4)                                                                         | 19.765(4)                                                                              | 20.358(4)                                                                                         |
| α/°                                         | 83.04(3)                                                                          | 83.45(3)                                                                               | 90                                                                                                |
| β/°                                         | 81.57(3)                                                                          | 81.70(3)                                                                               | 90                                                                                                |
| γ/°                                         | 62.69(3)                                                                          | 63.22(3)                                                                               | 90                                                                                                |
| Volume/Å <sup>3</sup>                       | 3489.6(15)                                                                        | 3523.5(15)                                                                             | 5792(2)                                                                                           |
| Z                                           | 1                                                                                 | 1                                                                                      | 4                                                                                                 |
| ρ <sub>calc</sub> /cm <sup>3</sup>          | 1.377                                                                             | 1.374                                                                                  | 1.436                                                                                             |
| μ/mm <sup>-1</sup>                          | 0.556                                                                             | 0.551                                                                                  | 0.736                                                                                             |
| F(000)                                      | 1498                                                                              | 1510                                                                                   | 2596                                                                                              |
| Crystal size/mm <sup>3</sup>                | 0.04 × 0.01 × 0.01                                                                | 0.08 × 0.03 × 0.01                                                                     | 0.04 × 0.02 × 0.01                                                                                |
| Radiation                                   | Synchrotron (λ = 0.71088)                                                         | Synchrotron (λ = 0.71076)                                                              | Synchrotron (λ = 0.71088)                                                                         |
| 2θ range/°                                  | 2.09 to 49.998                                                                    | 3.106 to 62.688                                                                        | 2.972 to 54.996                                                                                   |
| Index ranges                                | -16 ≤ h ≤ 16, -17 ≤ k ≤ 17, -23 ≤ l ≤ 23                                          | -19 ≤ h ≤ 19, -21 ≤ k ≤ 21, -28 ≤ l ≤ 28                                               | -19 ≤ h ≤ 19, -24 ≤ k ≤ 24, -26 ≤ l ≤ 26                                                          |
| Reflections collected                       | 65545                                                                             | 175375                                                                                 | 183909                                                                                            |
| Independent reflections                     | 23430 [R <sub>int</sub> = 0.1255, R <sub>sigma</sub> = 0.1194]                    | 39847 [R <sub>int</sub> = 0.0750, R <sub>sigma</sub> = 0.0414]                         | 13298 [R <sub>int</sub> = 0.2071, R <sub>sigma</sub> = 0.0634]                                    |
| Data/restraints/parameters                  | 23430/103/1673                                                                    | 39847/53/1874                                                                          | 13298/1/738                                                                                       |
| GOOF on F <sup>2</sup>                      | 0.997                                                                             | 1.042                                                                                  | 1.089                                                                                             |
| Final R indexes [I >= 2σ (I)]               | R <sub>1</sub> = 0.0937, wR <sub>2</sub> = 0.2450                                 | R <sub>1</sub> = 0.0544, wR <sub>2</sub> = 0.1614                                      | R <sub>1</sub> = 0.1157, wR <sub>2</sub> = 0.3045                                                 |
| Final R indexes [all data]                  | R <sub>1</sub> = 0.1508, wR <sub>2</sub> = 0.2892                                 | R <sub>1</sub> = 0.0632, wR <sub>2</sub> = 0.1728                                      | R <sub>1</sub> = 0.1297, wR <sub>2</sub> = 0.3143                                                 |
| Largest diff. peak/hole / e Å <sup>-3</sup> | 1.07/-0.80                                                                        | 0.62/-0.64                                                                             | 1.41/-1.09                                                                                        |
| Flack parameter                             | 0.103(13)                                                                         | 0.003(3)                                                                               | 0.064(7)                                                                                          |

**Table S1.** Crystallographic and refinement parameters for all compounds. + Data treated using the SQUEEZE routine of PLATON.<sup>1</sup> \*Data treated using the BYPASS routine of Olex2.<sup>2</sup>

## 1.2 Bond Tables

| Bonds and long contacts with Co <sup>II</sup> |                  |            | Bond angles     |        |                  |           |
|-----------------------------------------------|------------------|------------|-----------------|--------|------------------|-----------|
| Atom 1                                        | Atom 2           | Length (Å) | Atom 1          | Atom 2 | Atom 3           | Angle (°) |
| Co1                                           | O7               | 1.997(11)  | O7              | Co1    | O31 <sup>1</sup> | 97.0(5)   |
| Co1                                           | O8               | 2.514(17)  | O7              | Co1    | N3               | 103.9(6)  |
| Co1                                           | O31 <sup>1</sup> | 2.059(11)  | O7              | Co1    | N7               | 107.3(5)  |
| Co1                                           | O32 <sup>1</sup> | 2.421(15)  | N3              | Co1    | O31 <sup>1</sup> | 110.8(7)  |
| Co1                                           | N3               | 2.027(16)  | N7              | Co1    | O31 <sup>1</sup> | 101.5(6)  |
| Co1                                           | N7               | 2.018(14)  | N7              | Co1    | N3               | 131.3(7)  |
| Co2                                           | O9               | 2.024(12)  | O9              | Co2    | O17              | 100.3(5)  |
| Co2                                           | O10              | 2.923(16)  | O9              | Co2    | O18              | 161.2(6)  |
| Co2                                           | O17              | 2.104(10)  | O17             | Co2    | O18              | 61.0(5)   |
| Co2                                           | O18              | 2.332(13)  | N6              | Co2    | O9               | 104.9(6)  |
| Co2                                           | O24              | 2.831(12)  | N6              | Co2    | O17              | 112.6(5)  |
| Co2                                           | N6               | 2.023(16)  | N6              | Co2    | O18              | 83.2(6)   |
| Co2                                           | N10              | 1.993(17)  | N10             | Co2    | O9               | 104.1(6)  |
|                                               |                  |            | N10             | Co2    | O17              | 106.7(6)  |
|                                               |                  |            | N10             | Co2    | O18              | 84.0(6)   |
|                                               |                  |            | N10             | Co2    | N6               | 125.1(7)  |
| Co3                                           | O15              | 2.047(12)  | O15             | Co3    | O16              | 58.2(5)   |
| Co3                                           | O16              | 2.377(12)  | O15             | Co3    | C59              | 29.6(7)   |
| Co3                                           | O23              | 2.009(11)  | O16             | Co3    | C59              | 28.7(6)   |
| Co3                                           | O24              | 2.831(12)  | O23             | Co3    | O15              | 100.1(5)  |
| Co3                                           | N15              | 2.035(13)  | O23             | Co3    | O16              | 157.9(5)  |
| Co3                                           | N19              | 2.037(12)  | O23             | Co3    | N15              | 107.2(5)  |
| Co3                                           | C59              | 2.507(14)  | O23             | Co3    | N19              | 103.7(5)  |
|                                               |                  |            | O23             | Co3    | C59              | 129.6(7)  |
|                                               |                  |            | N15             | Co3    | O15              | 102.6(5)  |
|                                               |                  |            | N15             | Co3    | O16              | 84.0(4)   |
|                                               |                  |            | N15             | Co3    | N19              | 126.8(6)  |
|                                               |                  |            | N15             | Co3    | C59              | 93.1(5)   |
|                                               |                  |            | N19             | Co3    | O15              | 113.4(5)  |
|                                               |                  |            | N19             | Co3    | O16              | 83.2(5)   |
|                                               |                  |            | N19             | Co3    | C59              | 99.3(6)   |
| Co4                                           | O1 <sup>2</sup>  | 2.068(11)  | O1 <sup>2</sup> | Co4    | O2 <sup>2</sup>  | 57.1(4)   |
| Co4                                           | O2 <sup>2</sup>  | 2.408(11)  | O25             | Co4    | O1 <sup>2</sup>  | 101.1(5)  |
| Co4                                           | O25              | 2.034(13)  | O25             | Co4    | O2 <sup>2</sup>  | 158.2(5)  |
| Co4                                           | O26              | 2.721(14)  | N18             | Co4    | O1 <sup>2</sup>  | 103.8(5)  |
| Co4                                           | N18              | 2.029(14)  | N18             | Co4    | O2 <sup>2</sup>  | 81.6(5)   |
| Co4                                           | N22              | 2.014(14)  | N18             | Co4    | O25              | 107.5(5)  |
|                                               |                  |            | N22             | Co4    | O1 <sup>2</sup>  | 107.7(5)  |
|                                               |                  |            | N22             | Co4    | O2 <sup>2</sup>  | 84.7(5)   |
|                                               |                  |            | N22             | Co4    | O25              | 102.5(5)  |
|                                               |                  |            | N22             | Co4    | N18              | 130.6(6)  |

<sup>1</sup>-2+X,-1+Y,-1+Z; <sup>2</sup>2+X,1+Y,1+Z

**Table S2.** Bond lengths (left) and bond angles (right) of atoms with bonds or long contacts to Co<sup>II</sup> centres for *poly*-[Co<sub>4</sub>(AlaPmDI)<sub>4</sub>(bix)<sub>4</sub>].2DMF·7H<sub>2</sub>O (**1**).

| Bonds and long contacts with Co <sup>II</sup> |                  |            | Bond angles      |        |        |            |
|-----------------------------------------------|------------------|------------|------------------|--------|--------|------------|
| Atom 1                                        | Atom 2           | Length (Å) | Atom 1           | Atom 2 | Atom 3 | Angle (°)  |
| Co1                                           | O7               | 2.068(3)   | O7               | Co1    | O8     | 58.84(13)  |
| Co1                                           | O8               | 2.385(4)   | O31 <sup>1</sup> | Co1    | O7     | 100.13(13) |
| Co1                                           | O31 <sup>1</sup> | 2.004(3)   | O31 <sup>1</sup> | Co1    | O8     | 158.63(12) |
| Co1                                           | O32 <sup>1</sup> | 2.763(4)   | O31 <sup>1</sup> | Co1    | N3     | 106.03(15) |
| Co1                                           | N3               | 2.028(3)   | O31 <sup>1</sup> | Co1    | N7     | 102.97(14) |
| Co1                                           | N7               | 2.035(4)   | N3               | Co1    | O7     | 102.88(13) |
|                                               |                  |            | N3               | Co1    | O8     | 84.14(15)  |
|                                               |                  |            | N3               | Co1    | N7     | 128.44(14) |
|                                               |                  |            | N7               | Co1    | O7     | 112.82(14) |
|                                               |                  |            | N7               | Co1    | O8     | 83.91(14)  |
| Co2                                           | O9               | 2.023(3)   | O9               | Co2    | O17    | 99.25(12)  |
| Co2                                           | O10              | 2.619(4)   | O9               | Co2    | O18    | 157.90(12) |
| Co2                                           | O17              | 2.065(3)   | O9               | Co2    | N6     | 106.19(13) |
| Co2                                           | O18              | 2.406(3)   | O9               | Co2    | N10    | 101.31(14) |
| Co2                                           | N6               | 2.038(3)   | O17              | Co2    | O18    | 58.72(10)  |
| Co2                                           | N10              | 2.052(3)   | N6               | Co2    | O17    | 103.46(13) |
|                                               |                  |            | N6               | Co2    | O18    | 82.68(12)  |
|                                               |                  |            | N6               | Co2    | N10    | 134.39(14) |
|                                               |                  |            | N10              | Co2    | O17    | 107.20(14) |
|                                               |                  |            | N10              | Co2    | O18    | 85.25(13)  |
| Co3                                           | O15              | 2.059(3)   | O15              | Co3    | O16    | 58.81(13)  |
| Co3                                           | O16              | 2.389(4)   | O23              | Co3    | O15    | 97.45(14)  |
| Co3                                           | O23              | 2.034(3)   | O23              | Co3    | O16    | 156.02(13) |
| Co3                                           | O24              | 2.523(5)   | O23              | Co3    | N19    | 105.87(15) |
| Co3                                           | N15              | 2.026(4)   | N15              | Co3    | O15    | 108.7(2)   |
| Co3                                           | N19              | 2.042(4)   | N15              | Co3    | O16    | 82.5(2)    |
|                                               |                  |            | N15              | Co3    | O23    | 104.2(2)   |
|                                               |                  |            | N15              | Co3    | N19    | 132.92(17) |
|                                               |                  |            | N19              | Co3    | O15    | 102.34(15) |
|                                               |                  |            | N19              | Co3    | O16    | 84.35(16)  |
| Co4                                           | O1 <sup>2</sup>  | 1.998(4)   | O1 <sup>2</sup>  | Co4    | O25    | 101.56(14) |
| Co4                                           | O2 <sup>2</sup>  | 2.858(4)   | O1 <sup>2</sup>  | Co4    | O26    | 160.84(13) |
| Co4                                           | O25              | 2.062(3)   | O1 <sup>2</sup>  | Co4    | N18    | 102.57(18) |
| Co4                                           | O26              | 2.362(3)   | O1 <sup>2</sup>  | Co4    | N22    | 104.57(18) |
| Co4                                           | N18              | 2.022(4)   | O25              | Co4    | O26    | 59.39(11)  |
| Co4                                           | N22              | 2.034(4)   | N18              | Co4    | O25    | 112.39(14) |
|                                               |                  |            | N18              | Co4    | O26    | 84.70(15)  |
|                                               |                  |            | N18              | Co4    | N22    | 127.26(15) |
|                                               |                  |            | N22              | Co4    | O25    | 105.26(14) |
|                                               |                  |            | N22              | Co4    | O26    | 84.06(15)  |

<sup>1</sup>-2+X,-1+Y,-1+Z; <sup>2</sup>2+X,1+Y,1+Z

**Table S3.** Bond lengths (left) and bond angles (right) of atoms with bonds or long contacts to Co<sup>II</sup> centres for *poly*-{[Co<sub>4</sub>(AlaPmDI)<sub>4</sub>(bix)<sub>4</sub>].2DMF.0.25PE.6.5H<sub>2</sub>O} (1-PE ⊂ 1):

| Bonds and long contacts with Co <sup>II</sup> |                 |            | Bond angles     |        |        |           |
|-----------------------------------------------|-----------------|------------|-----------------|--------|--------|-----------|
| Atom 1                                        | Atom 2          | Length (Å) | Atom 1          | Atom 2 | Atom 3 | Angle (°) |
| Co1                                           | Cl1             | 2.291(4)   | O7              | Co1    | Cl1    | 109.2(3)  |
| Co1                                           | O7              | 1.959(9)   | O7              | Co1    | N7     | 112.5(4)  |
| Co1                                           | O8              | 2.702(9)   | O7              | Co1    | N3     | 110.1(4)  |
| Co1                                           | N7              | 2.008(10)  | N7              | Co1    | Cl1    | 104.3(3)  |
| Co1                                           | N3              | 2.014(13)  | N7              | Co1    | N3     | 119.5(5)  |
|                                               |                 |            | N3              | Co1    | Cl1    | 99.9(4)   |
| Co2                                           | Cl2             | 2.283(4)   | O1 <sup>1</sup> | Co2    | Cl2    | 106.7(3)  |
| Co2                                           | O1 <sup>1</sup> | 2.013(10)  | O1 <sup>1</sup> | Co2    | N10    | 109.8(4)  |
| Co2                                           | O2 <sup>1</sup> | 2.412(10)  | O1 <sup>1</sup> | Co2    | N6     | 106.3(4)  |
| Co2                                           | N10             | 2.027(11)  | N10             | Co2    | Cl2    | 97.7(4)   |
| Co2                                           | N6              | 2.031(11)  | N10             | Co2    | N6     | 129.7(5)  |
|                                               |                 |            | N6              | Co2    | Cl2    | 104.2(4)  |

<sup>1</sup>+X,+Y,-1+Z; <sup>2</sup>+X,+Y,1+Z

**Table S4.** Bond lengths (left) and bond angles (right) of atoms with bonds or long contacts to Co<sup>II</sup> centres for *poly*-[Co<sub>2</sub>(AlaPmDI)(bix)<sub>2</sub>Cl<sub>2</sub>] · 2DMF · 2H<sub>2</sub>O (**2**),

### 1.3 Additional Crystallographic Refinement Details

#### *poly*-[Co<sub>4</sub>(AlaPmDI)<sub>4</sub>(bix)<sub>4</sub>]·2DMF·7H<sub>2</sub>O (**1**):

The data is of low quality (as seen by high  $R_{\text{int}}$  and  $wR_2$  values), but was the best data that could be obtained using synchrotron radiation. Due to poor diffraction to high angle, the dataset was truncated to  $2\theta = 50^\circ$ . Better quality data of the same structure with 1-phenylethanol was obtained. However, this dataset of the structure without 1-phenylethanol is included for completeness. A number of restraints were required for bond lengths and displacement ellipsoids, primarily those associated with the imidazole rings, as shown in the information embedded in CIF file. Electron density within voids that could not be sensibly modelled had its contribution to the diffraction data accounted for using the SQUEEZE feature within PLATON<sup>1</sup> (results discussed in main manuscript).

#### *poly*-{[Co<sub>4</sub>(AlaPmDI)<sub>4</sub>(bix)<sub>4</sub>]·2DMF·0.25PE·6.5H<sub>2</sub>O} (1-PE $\subset$ **1**):

The 1-phenylethanol present was found from the electron density peaks, and is modelled at fixed 0.25 occupancy. An AFIX66 constraint was applied to the benzene ring in 1-phenylethanol to model it as a rigid hexagon, alongside DELU and SIMU restraints. The modelling of 1-phenylethanol was attempted with both (R) and (S)-1-phenylethanol, and gave similar  $R_{\text{int}}$  values. The final model includes 1-phenylethanol as the (R) enantiomer, for consistency with results from the enantioselective chromatographic separations experiments. Electron density within voids that could not be sensibly modelled had its contribution to the diffraction data accounted for using the BYPASS routine within Olex2.<sup>2</sup>

#### *poly*-[Co<sub>2</sub>(AlaPmDI)(bix)<sub>2</sub>Cl<sub>2</sub>]·2DMF·2H<sub>2</sub>O (**2**):

A DFIX restraint was added to a long carbonyl bond on a DMF solvent molecule.

## 2. Powder X-Ray Diffraction (PXRD)

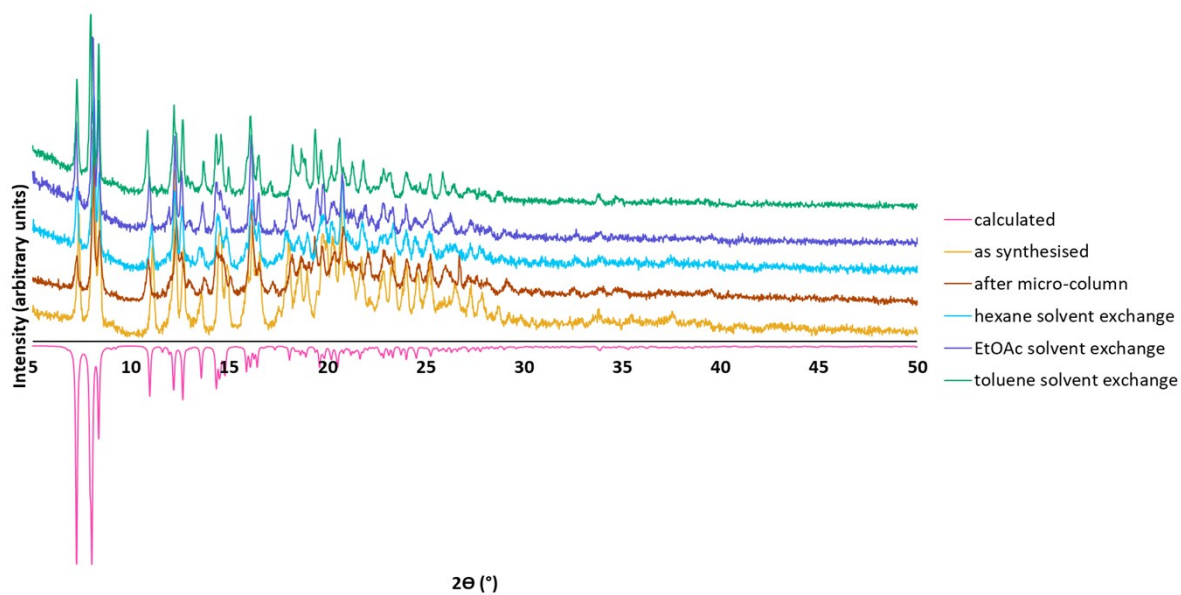

**Figure S1.** Comparison of calculated (100 K) and experimental (298 K) PXRD patterns for *poly*-[Co(AlaPmDI)(bix)]·2DMF·7H<sub>2</sub>O (**1**).

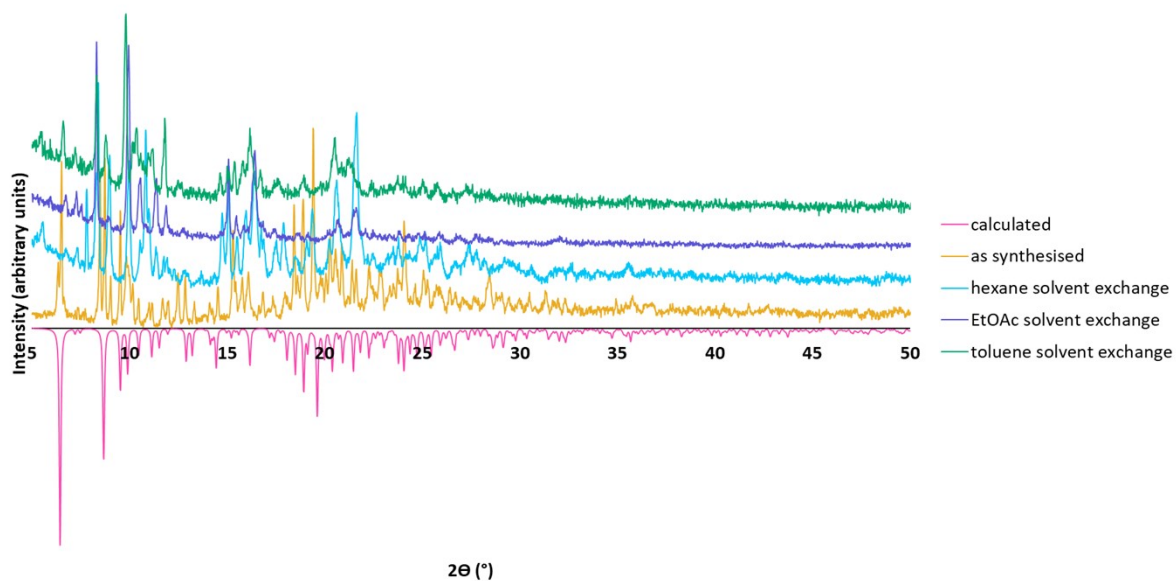

**Figure S2.** Comparison of calculated (100 K) and experimental (298 K) PXRD patterns for *poly*-[Co<sub>2</sub>(AlaPmDI)(bix)<sub>2</sub>Cl<sub>2</sub>]·2DMF·2H<sub>2</sub>O (**2**).

### 3. Separation Studies

#### 3.1 Chiral GC-FID

Analyte solutions were injected into an Agilent 7820A GC coupled with flame ionisation detection (FID). The detector temperature was 300 °C. Data were collected at 20 Hz. Data acquisition and analysis was performed using Agilent software. The conditions for each analyte were as follows:

##### **Toluene** (100 ppm toluene in *n*-hexane):

The oven temperature program started at 40 °C (held for 4 min), ramped to 60 °C at 5 °C/min, and then ramped to 160 °C at 40 °C/min (held for 0.5 min). Nitrogen was used as carrier gas at a flow rate of 1.4 mL/min, and the inlet temperature was 230 °C. A  $\beta$ -DEX<sup>TM</sup> 110 column of 30 m  $\times$  0.25 mm  $\times$  0.25  $\mu$ m film thickness was used with autosampler injection (1  $\mu$ L, split ratio 10:1).

##### **Ethyl acetate** (100 ppm ethyl acetate in *n*-hexane):

The oven temperature program started at 40 °C (held for 3 min), ramped to 125 °C at 30 °C/min (held for 0.5 min). Nitrogen was used as carrier gas at a flow rate of 1.4 mL/min, and the inlet temperature was 200 °C. A Supelco wax column of 30 m  $\times$  0.32 mm  $\times$  0.25  $\mu$ m film thickness was used with manual syringe injection (0.5  $\mu$ L, split ratio 10:1).

##### **1-Phenylethanol:**

A  $\beta$ -DEX<sup>TM</sup> 110 column of 30 m  $\times$  0.25 mm  $\times$  0.25  $\mu$ m film thickness was used with autosampler injection (1  $\mu$ L). Soaking samples: The oven temperature program started at 80 °C (held for 1 min), ramped to 140 °C at 4 °C/min, and then ramped to 205 °C at 20 °C/min (held for 1 min). Nitrogen was used as carrier gas at a flow rate of 1.4 mL/min, and the inlet temperature was 230 °C. Injection split ratios of 5:1, 10:1, and 50:1 were used for the 10 ppm, 100 ppm, and 1000 ppm solutions respectively. Micro-column samples: The oven temperature program started at 80 °C (held for 1 min), and ramped to 205 °C at 50 °C/min (held for 3 min). Nitrogen was used as carrier gas at a flow rate of 1.2 mL/min, and the inlet temperature was 200 °C. The injection split ratio was 5:1.



### 3.2 Soaking Studies

|                        | concentration<br>(ppm) | analyte | solvent          | average<br>peak area as<br>% of control | standard<br>deviation of<br>measurement<br>(%) |
|------------------------|------------------------|---------|------------------|-----------------------------------------|------------------------------------------------|
| control                | 100                    | EtOAc   | <i>n</i> -hexane | 100                                     | 1                                              |
| H <sub>2</sub> AlaPmDI | 100                    | EtOAc   | <i>n</i> -hexane | 101                                     | 4                                              |
| <b>1</b>               | 100                    | EtOAc   | <i>n</i> -hexane | 96                                      | 3                                              |
| <b>2</b>               | 100                    | EtOAc   | <i>n</i> -hexane | 102                                     | 3                                              |
| control                | 100                    | toluene | <i>n</i> -hexane | 100                                     | 4                                              |
| H <sub>2</sub> AlaPmDI | 100                    | toluene | <i>n</i> -hexane | 100                                     | 4                                              |
| <b>1</b>               | 100                    | toluene | <i>n</i> -hexane | 102                                     | 4                                              |
| <b>2</b>               | 100                    | toluene | <i>n</i> -hexane | 98                                      | 4                                              |

**Table S5.** Amounts of EtOAc and toluene remaining after soaking the framework materials, **1**, **2**, and H<sub>2</sub>AlaPmDI in a 100 ppm solution in *n*-hexane to allow for sorption. Control samples were of the soaking solution without any solid material. The reported peak area is an average of three GC-FID runs. Small changes in concentration occurred during handling and sampling due to solvent loss.

### 3.3 'Micro-column' Study

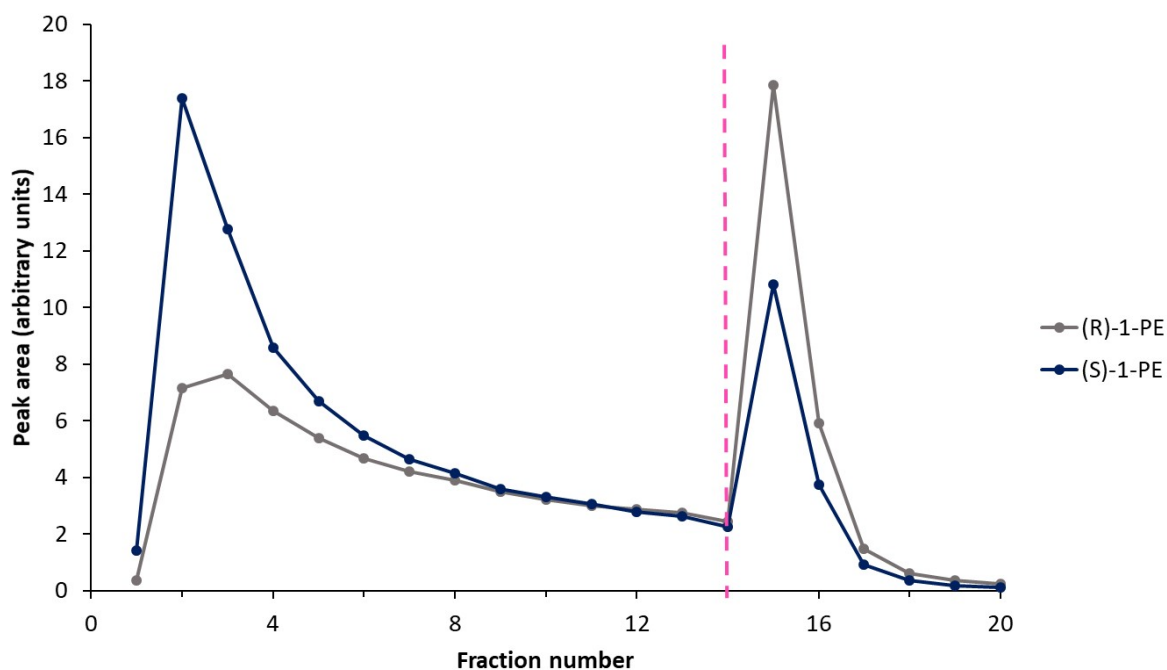

**Figure S4.** Plots of eluted peak area of (R) and (S)-1-phenylethanol vs. fraction number (100 - 200  $\mu$ L per fraction) for micro-column packed with **1** as a stationary phase. The eluent was initially 20:1 *n*-hexane:ethyl acetate and was changed to 100% ethyl acetate at fraction 14.

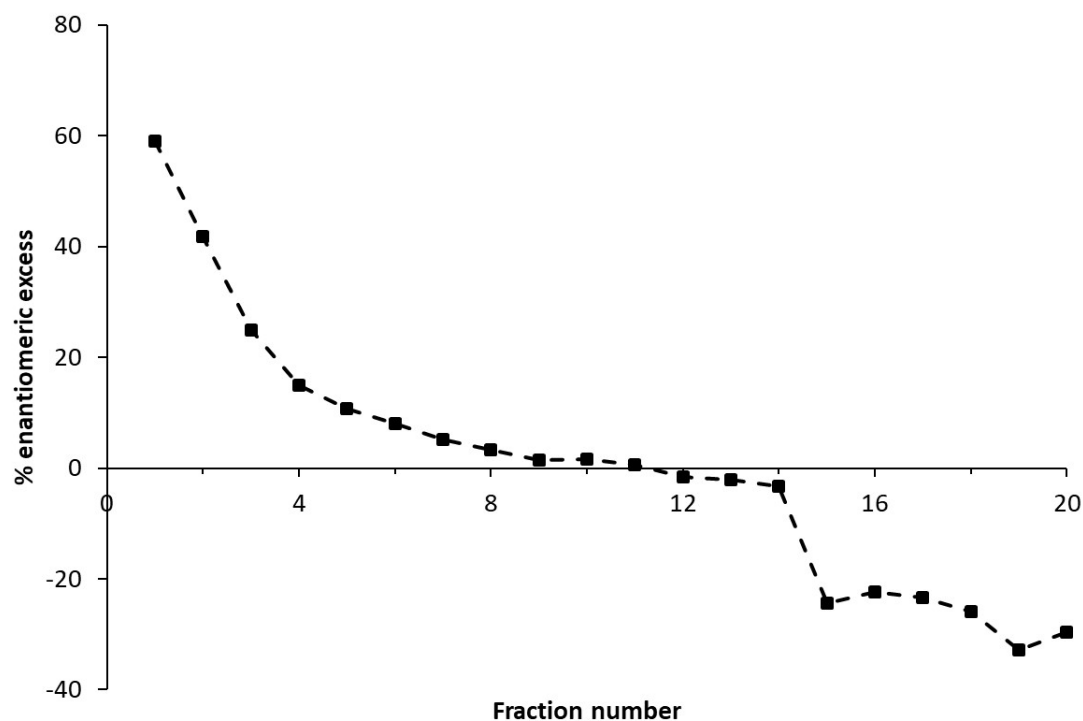

**Figure S5.** Plot of % enantiomeric excess (% ee) vs. fraction number (100 - 200  $\mu$ L per fraction) of recovered fractions of 1-phenylethanol eluted from a micro-column packed with **1** as a stationary phase.

#### 4. Thermogravimetric Analysis Traces

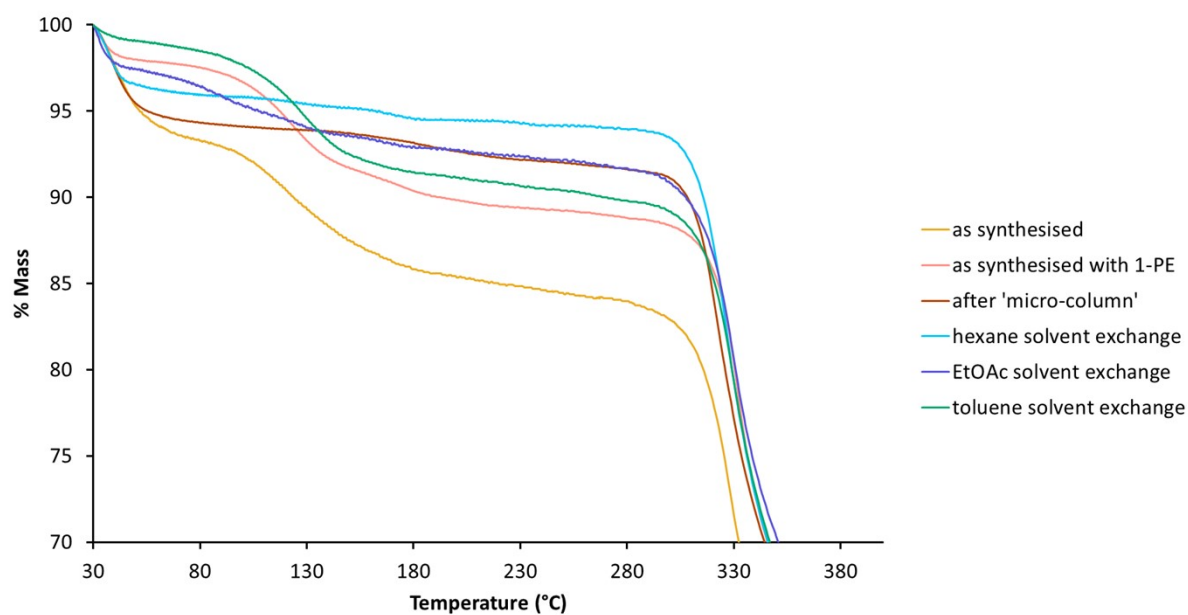

**Figure S6.** Thermogravimetric analysis trace of  $poly-[Co(AlaPmDI)(bix)] \cdot 2DMF \cdot 7H_2O$  (**1**) as synthesised, with and without 1-phenylethanol (1-PE), after 'micro-column', and after soaking in *n*-hexane, EtOAc, and toluene for 24 hours.

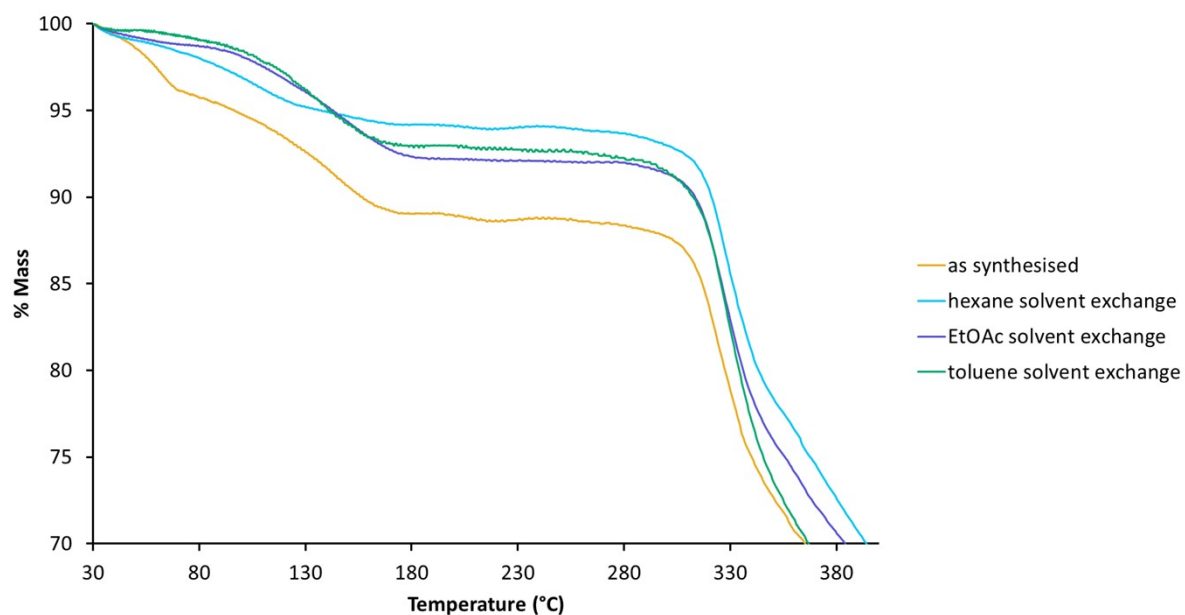

**Figure S7.** Thermogravimetric analysis trace of  $poly-[Co_2(AlaPmDI)(bix)_2Cl_2] \cdot 2DMF \cdot 2H_2O$  (**2**) as synthesised, and after soaking in *n*-hexane, EtOAc, and toluene for 24 hours.

## 5. References

1. A. Spek, PLATON SQUEEZE: a tool for the calculation of the disordered solvent contribution to the calculated structure factors, *Acta Cryst. C*, 2015, **71**, 9-18.
2. O. V. Dolomanov, L. J. Bourhis, R. J. Gildea, J. A. K. Howard and H. Puschmann, OLEX2: a complete structure solution, refinement and analysis program, *J. Appl. Crystallogr.*, 2009, **42**, 339-341.
